1 **Version 1**

**Xiamen University**

2

3 **Title: A mathematical model for estimating the age-specific transmissibility of a novel**  
4 **coronavirus**

5 **Running title: Age-specific transmissibility of SARS-CoV-2**

6 **Ze-Yu Zhao<sup>1\*</sup>, Yuan-Zhao Zhu<sup>1\*</sup>, Jing-Wen Xu<sup>1\*</sup>, Qing-Qing Hu<sup>2</sup>, Zhao Lei<sup>1</sup>, Jia Rui<sup>1</sup>, Xing-Chun**  
7 **Liu<sup>1</sup>, Yao Wang<sup>1</sup>, Meng Yang<sup>1</sup>, Li Luo<sup>1</sup>, Shan-Shan Yu<sup>1</sup>, Jia Li<sup>1</sup>, Ruo-Yun Liu<sup>1</sup>, Fang Xie<sup>1</sup>,**  
8 **Ying-Ying Su<sup>1</sup>, Yi-Chen Chiang<sup>1</sup>, Yan-Hua Su<sup>1#</sup>, Ben-Hua Zhao<sup>1#</sup>, Tian-Mu Chen<sup>1#</sup>**

9 <sup>1</sup>State Key Laboratory of Molecular Vaccinology and Molecular Diagnostics, School of Public Health,  
10 Xiamen University, Xiamen City 361102, Fujian Province, People's Republic of China

11 <sup>2</sup>Division of Public Health, School of Medicine, University of Utah, 201 Presidents Circle, Salt Lake City  
12 84112, Utah, USA

13 **\*These authors contributed equally to this study.**

14

15 **#Correspondence:**

16 **Tianmu Chen**

17 State Key Laboratory of Molecular Vaccinology and Molecular Diagnostics, School of Public Health,  
18 Xiamen University

19 4221-117 South Xiang'an Road, Xiang'an District, Xiamen City, Fujian Province, People's Republic of  
20 China

21 Tel: +86-13661934715

22 Email: [chentianmu@xmu.edu.cn](mailto:chentianmu@xmu.edu.cn), [13698665@qq.com](mailto:13698665@qq.com)

**NOTE: This preprint reports new research that has not been certified by peer review and should not be used to guide clinical practice.**

23 **Yanhua Su**

24 State Key Laboratory of Molecular Vaccinology and Molecular Diagnostics, School of Public Health,

25 Xiamen University,

26 4221-117 South Xiang'an Road, Xiang'an District, Xiamen City, Fujian Province, People's Republic of

27 China,

28 Email: [suyanhua813@xmu.edu.cn](mailto:suyanhua813@xmu.edu.cn)

29

30 **Benhua Zhao**

31 State Key Laboratory of Molecular Vaccinology and Molecular Diagnostics, School of Public Health,

32 Xiamen University,

33 4221-117 South Xiang'an Road, Xiang'an District, Xiamen City, Fujian Province, People's Republic of

34 China, Email: [benhuazhao@163.com](mailto:benhuazhao@163.com)

35

36

37 **Abstract**

38 **Background:** A novel coronavirus named as "SARS-CoV-2" has spread widely in many countries since

39 December 2019, especially in China. This study aimed to quantify the age-specific transmissibility by

40 using a mathematical model.

41 **Methods:** An age-specific susceptible – exposed – symptomatic – asymptomatic – recovered –

42 seafood market (SEIARW) model was developed based on two suspected transmission routes (from

43 market to person and person to person). The susceptible people from Wuhan City were divided into

44 different age groups. We used the subscript  $i$  and  $j$  to represent age group 1 to 4 ( $i \neq j$ ; 1:  $\leq 14$  years; 2:

45 15-44 years; 3: 45-64 years; 4:  $\geq 65$  years) and 1 to 5 ( $i \neq j$ ; 1:  $\leq 5$  years; 2: 6-14 years; 3: 15-24 years; 4:  
46 25-59 years; 4:  $\geq 60$  years), respectively. Data of reported COVID-19 cases were collected from one  
47 published literature from 26 November to 22 December, 2019 in Wuhan City, China. The age-specific  
48 transmissibility of the virus was estimated accordingly secondary attack rate (SAR).

49 **Results:** The age-specific SEIARW model fitted with the reported data well by dividing the population  
50 into four age groups ( $\chi^2 = 4.99 \times 10^{-6}$ ,  $P > 0.999$ ), and five age groups ( $\chi^2 = 4.85 \times 10^{-6}$ ,  $P > 0.999$ ).  
51 Based on the four-age-group SEIARW model, the highest transmissibility occurred from age group 2 to  
52 3 ( $SAR_{23} = 17.56$  per 10 million persons), followed by from age group 3 to 2 ( $SAR_{32} = 10.17$  per 10  
53 million persons). The lowest transmissibility occurred from age group 1 to 2 ( $SAR_{12} = 0.002$  per 10  
54 million persons). Based on the five-age-group SEIARW model, the highest transmissibility occurred  
55 from age group 4 to 5 ( $SAR_{45} = 12.40$  per 10 million persons), followed by from age group 5 to 4 ( $SAR_{54}$   
56 = 6.61 per 10 million persons). The lowest transmissibility occurred from age group 3 to 4 ( $SAR_{34} =$   
57 0.0002 per 10 million persons).

58 **Conclusions:** SARS-CoV-2 has high transmissibility among adults and elder people but low  
59 transmissibility among children and young people.

60 **Key words:** Transmissibility; Novel coronavirus; Mathematical model; Age-specific dynamics

61

## 62 Introduction

63 In December 2019, a series of cases were identified by a novel coronavirus named severe acute  
64 respiratory syndrome coronavirus 2 (SARS-CoV-2) was reported by Wuhan City, Hubei Province,  
65 China. The disease was named as coronavirus disease 2019 (COVID-19) by the World Health  
66 Organization in 11 February 2020. The patients may be related to have contacted with Huanan  
67 Seafood Wholesale Market[1], and the virus can continuously transmit from person-to-person with  
68 basic reproduction number ( $R_0$ ) of 2.2 (95% confidence interval [CI], 1.4 to 3.9)[2]. Another research  
69 estimated that the  $R_0$  of SARS-CoV-2 was 2.68 (95% CI, 2.47 to 2.86)[3].

70 Age-related transmissibility of COVID-19 has become a public health concern. The reported cases  
71 at the early stage (before 2 January 2020) of the transmission were higher than 18 years old and  
72 mainly were on 25-64 years old[1]. A study with 425 patients indicated that the median age was 59  
73 years (range, 15 to 89) and reported different case distributions in four age groups: 0 – 14, 15 – 44, 45  
74 – 64, and  $\geq 65$  years[2]. However, there is not enough epidemiological evidence to classify the age  
75 groups in transmission. In this study, we added another age classification scenario according to our  
76 previous research on influenza that people were divided into five age groups: 0 – 5, 6 – 14, 15 – 24, 25  
77 – 59, and  $\geq 60$  years[4], to better understand the transmissibility of the disease for different ages.

78 There were several studies focusing on mathematical modelling on COVID-19[2, 3], calculating the  
79  $R_0$  by using the serial intervals and intrinsic growth rate[2, 5, 6], or using ordinary differential equations  
80 and Markov Chain Monte Carlo methods[3]. We also developed a Bats-Hosts-Reservoir-People (BHRP)  
81 transmission network model and simplified the BHRP model as Reservoir-People (RP) transmission  
82 network model to calculate the transmissibility of SARS-CoV-2[7]. However, there is no age-specific  
83 mathematical model for quantifying the age-specific transmissibility SARS-CoV-2.

84 In this study, based on the RP model which we developed, we built an age-specific susceptible –  
85 exposed – symptomatic – asymptomatic – recovered – reservoir (SEIARW) model. The age-specific  
86 SEIARW model was employed to estimate the age-specific transmissibility of SARS-CoV-2 by fitting  
87 the data from 26 November to 23 December, 2019 from published literature[1].

88

## 89 **Methods**

### 90 **Data collection**

91 The data of COVID-19 were collected in Wuhan City from 26 November, 2019 to 23 December,  
92 2019 from a published literature[1], including 29 COVID-19 cases with the onset date and exposure  
93 history. The data of total population which were used in our model was from Wuhan City Statistics  
94 Bureau. The data of age group proportions, birth rate and death rate in our model was obtained from  
95 Wuhan Statistical Yearbook.

### 96 **Study design**

97 In this study, people were divided into 4 age groups based on the published literature[1], and 5 age  
98 groups based on our previous study[4]. We used the subscript  $i$  and  $j$  to represent age group 1 to 4 ( $i \neq j$ ;  
99 1: 0 – 14 years; 2: 15 – 44 years; 3: 45 – 64 years; 4:  $\geq 65$  years) and 1 to 5 ( $i \neq j$ ; 1: 0 – 5 years; 2: 6-14  
100 years; 3: 15-24 years; 4: 25-59 years; 4:  $\geq 60$  years), respectively.

### 101 **Age-specific transmission model**

102 Our previous study showed that the SEIARW model could be adopted to simulate the infectious  
103 diseases transmitted from reservoir (such as water or food) to people and from person to person[8, 9].  
104 In this study, the age-specific SEIARW model was developed based on two transmission routes (form  
105 market to person and person to person). In the model, people were divided into five compartments:

106 susceptible ( $S$ ), exposed ( $E$ ), symptomatic ( $I$ ), asymptomatic ( $A$ ), recovered ( $R$ ), and the seafood  
107 market were defined as reservoir ( $W$ ). The definitions of the six compartments were shown in [Table 1](#).

108 The model was based on following assumptions:

109 a) Susceptible individuals become infected by contact with infected/asymptomatic people;

110 b) SARS-CoV-2 can transmit within each age group. The transmission rate of age group  $i$  and  $j$  are  
111  $\beta_{ij}$  and  $\beta_{ji}$  respectively.

112 c) SARS-CoV-2 can be transmitted between different age groups. The transmission rate from age  
113 group  $i$  to  $j$  is  $\beta_{ij}$  and from  $j$  to  $i$  is  $\beta_{ji}$ .

114 d) Susceptible people will be infected after contact with seafood market, and the infection rate  
115 coefficient is  $\beta_w$ ;

116 e) All the newborn individuals which were assumed as susceptible were added into age group 1.  
117 Each age group has a natural mortality rate. We set the natural birth rate is  $br$ , and the natural mortality  
118 rate is  $dr$ ;

119 f) The incubation period of exposed person is  $1/\omega$ . The exposed person will become asymptomatic  
120 people after a latent period of  $1/\omega'$ . We describe  $p$  ( $0 \leq p \leq 1$ ) as the proportion of asymptomatic  
121 infection. Exposed individuals will become asymptomatic person  $A$  with a daily rate of  $pE$ , and become  
122 symptomatic person with a daily rate of  $(1-p)E$ ;

123 g) The transmissibility of  $A$  is  $\kappa$  times ( $0 \leq \kappa \leq 1$ ) of that of  $I$ .

124 h) The individuals  $I$  and  $A$  will become recovered person ( $R$ ) after an infectious period of  $1/\gamma$  and  
125  $1/\gamma'$ . A part of  $I$  would die due to the infection. We assumed that the case fatality rate was  $f$ .

126 i)  $I$  and  $A$  individuals can shed pathogens into  $W$  with the shedding rate of  $\mu I$  and  $\mu' A$ , where  $\mu$  and  
127  $\mu'$  are the shedding coefficients;

128 j) SARS-CoV-2 will remove in the market after a given period (the life time of the virus is  $1/\varepsilon$ ), and  
 129 the daily decreasing rate of the pathogen is  $\varepsilon W$ .

130 The flowchart of the model was shown in [Figure 1](#). The equations of the age-specific SEIARW  
 131 model were shown as follows:

$$\frac{dS_i}{dt} = brN - \beta_{ii}S_i(I_i + \kappa A_i) - \beta_{ji}S_i(I_j + \kappa A_j) - \beta_w S_i W - drS_i$$

$$\frac{dE_i}{dt} = \beta_{ii}S_i(I_i + \kappa A_i) + \beta_{ji}S_i(I_j + \kappa A_j) - (1-p)\omega E_i - p\omega' E_i - drE_i$$

$$\frac{dI_i}{dt} = (1-p)\omega E_i - \gamma I_i - (dr + f)I_i$$

$$\frac{dA_i}{dt} = p\omega' E_i - \gamma' A_i - drA_i$$

$$\frac{dR_i}{dt} = \gamma I_i + \gamma' A_i - drR_i$$

$$\frac{dS_j}{dt} = brN - \beta_{jj}S_j(I_j + \kappa A_j) - \beta_{ji}S_j(I_i + \kappa A_i) - \beta_w S_j W - drS_j$$

$$\frac{dE_j}{dt} = \beta_{jj}S_j(I_j + \kappa A_j) + \beta_{ji}S_j(I_i + \kappa A_i) + \beta_w S_j W - (1-p)\omega E_j - p\omega' E_j - drE_j$$

$$\frac{dI_j}{dt} = (1-p)\omega E_j - \gamma I_j - (dr + f)I_j$$

$$\frac{dA_j}{dt} = p\omega' E_j - \gamma' A_j - drA_j$$

$$\frac{dR_j}{dt} = \gamma I_j + \gamma' A_j - drR_j$$

$$\frac{dW}{dt} = \mu(I_i + I_j) + \mu'(A_i + A_j) - \varepsilon W$$

$$N = S_i + E_i + I_i + A_i + R_i + S_j + E_j + I_j + A_j + R_j$$

132  
 133 Since the different dimension of people and the virus, we adopt the following sets to perform the  
 134 normalization:

135  $s_i = S_i/N$ ,  $e_i = E_i/N$ ,  $i_i = I_i/N$ ,  $a_i = A_i/N$ ,  $r_i = R_i/N$ ,  $s_j = S_j/N$ ,  $e_j = E_j/N$ ,  $i_j = I_j/N$ ,  $a_j = A_j/N$ ,

136  $r_j = R_j/N$ ,  $w = \varepsilon W/\mu N$ ,  $\mu' = c\mu$ ,  $b_{ii} = \beta_{ii}N$ ,  $b_{ij} = \beta_{ij}N$ ,  $b_{jj} = \beta_{jj}N$ ,  $b_{ji} = \beta_{ji}N$ ,  $b_w = \mu\beta_w N/\varepsilon$ .

137

138 In the normalization, parameter  $c$  refers to relative shedding coefficients of  $A$  compared to  $I$ . The

139 normalized model is expressed as follows:

$$\frac{ds_i}{dt} = brn - b_{ii}s_i(i_i + \kappa a_i) - b_{ji}s_i(i_j + \kappa a_j) - b_w s_i w - drs_i$$

$$\frac{de_i}{dt} = b_{ii}s_i(i_i + \kappa a_i) + b_{ji}s_i(i_j + \kappa a_j) - (1 - p)\omega e_i - p\omega' e_i - dre_i$$

$$\frac{di_i}{dt} = (1 - p)\omega e_i - \gamma i_i - (dr + f)i_i$$

$$\frac{da_i}{dt} = p\omega' e_i - \gamma' a_i - dra_i$$

$$\frac{dr_i}{dt} = \gamma i_i + \gamma' a_i - drr_i$$

$$\frac{ds_j}{dt} = brn - b_{jj}s_j(i_j + \kappa a_j) - b_{ji}s_j(i_i + \kappa a_i) - b_w s_j w - drs_j$$

$$\frac{de_j}{dt} = b_{jj}s_j(i_j + \kappa a_j) + b_{ji}s_j(i_i + \kappa a_i) + b_w s_j w - (1 - p)\omega e_j - p\omega' e_j - dre_j$$

$$\frac{di_j}{dt} = (1 - p)\omega e_j - \gamma i_j - (dr + f)i_j$$

$$\frac{da_j}{dt} = p\omega' e_j - \gamma' a_j - dra_j$$

$$\frac{dr_j}{dt} = \gamma i_j + \gamma' a_j - drr_j$$

$$\frac{dw}{dt} = \varepsilon(i_i + i_j + c(a_i + a_j) - w)$$

$$n = s_i + e_i + j_i + a_i + r_i + s_j + e_j + i_j + a_j + r_j$$

140 The left side of the equation shows the instantaneous rate of change of  $S$ ,  $E$ ,  $I$ ,  $A$ ,  $R$  and  $W$  at time

141  $t$ . The subscript  $i$  and  $j$  ( $i \neq j$ ) represent age group 1 to 4/5 in the equation, respectively.

## 142 Parameters estimation

143 The mean incubation period was 5.2 days (95% confidence interval [CI]: 4.1–7.0) [2]. As reported

144 by Xu *et al* [10], the median time from exposure to onset of illness (infected) was 4 days (interquartile

145 range 3-5 days). Another study showed that the mean of incubation period was around 5 days and the

146 period falls within the range of 2-14 days [11]. We set the 5-day as the incubation period and the latent

147 period in this study. Thus,  $\omega = \omega' = 0.2$ .



148 Since there was no data on the proportion of asymptomatic infection of the virus, we simulated the  
149 baseline value of proportion of 0.5 ( $p = 0.5$ ). Since there was no evidence about the transmissibility of  
150 asymptomatic infection, we assumed that the transmissibility of asymptomatic infection was 0.5 times  
151 that of symptomatic infection ( $\kappa = 0.5$ ), which was the similar value as influenza[12]. We assumed that  
152 the relative shedding rate of  $A$  compared to  $I$  was 0.5. Thus,  $c = 0.5$ . Since the SARS-CoV-2 is an RNA  
153 virus, we assumed that it could be died in the environment in a short time, but it could stay for a longer  
154 time (10 days) in the unknown hosts in the market. We set  $\varepsilon = 0.1$ .

155 There is a mean 5-day delay from symptom onset to detection/hospitalization of a case (the cases  
156 detected in Thailand and Japan were hospitalized from 3-7 days after onset, respectively) [13-15].  
157 Another study showed that the mean time from illness onset to hospital admission (for treatment and/or  
158 isolation) was estimated at 3-4 days without truncation and at 5-9 days when right truncated[11]. As  
159 reported by Xu *et al*[10], the median time from onset of illness to first hospital admission was 2 (range  
160 from 1-4) days. A study including 45 patients diagnosed before January 1 was estimated to have a  
161 mean of 5.8 days (95% *CI*: 4.3–7.5) from illness onset to first medical visit[2]. In our model, we set the  
162 infectious period of the cases as 6 days. Therefore,  $\gamma = \gamma' = 0.1667$ .

163 According the official report by National Health Commission of the People's Republic of China, we  
164 collected the data of daily fatality from January 24<sup>th</sup> to 30<sup>th</sup>, 2020[16]. Therefore, we set  $f$  as 0.02348  
165 (range: 0.02198-0.03186). In this study, we set the total population as 11,081,000 so that  $br = 4.266 \times$   
166  $10^{-5}$  and  $dr = 3.184 \times 10^{-5}$  based on the 2018 Wuhan Statistical Yearbook (Table 2).

167 A two-step curve fitting method was adopted to estimate the parameter  $b_W$ ,  $b_{ii}$ ,  $b_{jj}$ ,  $b_{ij}$ , and  $b_{ji}$ . At the  
168 first step, we used the mix-age SEIARW model to fit the data and to estimate the parameter  $b_W$  and  
169 mix-age  $b$  (named as  $b_p$ ). At the second step, we used the age-specific SEIARW model to fit the data

170 and to estimate the parameter  $b_{ii}$ ,  $b_{jj}$ ,  $b_{ij}$ , and  $b_{ji}$ .

### 171 **Quantification of the age-specific transmissibility of SARS-CoV-2**

172 In the model the age-specific secondary attack rate (SAR) was employed to quantify the  
173 transmissibility of SARS-CoV-2. They were calculated as follows:

$$SAR_{ii} = \beta_{ii}/\gamma$$

$$SAR_{ij} = \beta_{ij}/\gamma$$

$$SAR_{ji} = \beta_{ji}/\gamma$$

$$SAR_{jj} = \beta_{jj}/\gamma$$

174 In the equations,  $SAR_{ii}$ ,  $SAR_{ij}$ ,  $SAR_{ji}$ , and  $SAR_{jj}$  refer to the age-specific SAR among age group  $i$ ,  
175 from age group  $i$  to  $j$ , from age group  $j$  to  $i$ , and among age group  $j$ , respectively.

176 To quantify the age-specific transmissibility of SARS-CoV-2, we also performed a simulation which  
177 was named as “knock-out” simulation in our previous study[17]. In this study, the “knock-out” simulation  
178 was defined as cutting off the route of transmission between or within different age groups, and was  
179 performed in the following scenarios: A)  $\beta_{ii} = 0$ ; B)  $\beta_{ji} = 0$ ; C)  $\beta_{ij} = 0$ ; D)  $\beta_{jj} = 0$ ; E) control (no cutting off  
180 transmission route).

### 181 **Simulation method and statistical analysis**

182 Berkeley Madonna 8.3.18 (developed by Robert Macey and George Oster of the University of  
183 California at Berkeley. Copyright ©1993-2001 Robert I. Macey & George F. Oster) was employed to  
184 perform the curve fitting and the simulation. The simulation methods (Runge-Kutta method of order four  
185 with tolerance set at 0.001) were the same as the previously published researches [18-24]. The data  
186 was analyzed and figured by using Microsoft Office Excel 2010 (Microsoft, Redmond, WA, USA) and  
187 GraphPad Prism 7.0 (GraphPad Software, La Jolla, CA). The goodness of fit was judged by coefficient

188 of determination ( $R^2$ ) and Chi-square ( $\chi^2$ ) value calculated by SPSS 21.0 (IBM Corp, Armonk, NY,  
189 USA).

## 190 **Sensitivity analysis**

191 Since nine parameters ( $p$ ,  $\kappa$ ,  $c$ ,  $\varepsilon$ ,  $\omega$ ,  $\omega'$ ,  $\gamma$ ,  $\gamma'$  and  $f$ ) in the models were collected from literatures,  
192 there might be some uncertainties in our model. Therefore, we performed sensitivity analysis of  
193 parameters  $p$ ,  $\kappa$ ,  $c$ ,  $\varepsilon$ ,  $\omega$ ,  $\omega'$ ,  $\gamma$ ,  $\gamma'$  and  $f$  by splitting them into 1,000 values ranging from 0 – 0.9, 0 – 1, 0 –  
194 1, 0 – 1, 0.1428 – 0.25, 0.1428 – 0.25, 0.125 – 0.25, 0.125 – 0.25, 0.02198 – 0.03186, respectively  
195 ([Table 2](#)).

196

## 197 **Results**

### 198 **Epidemiological characteristics and curve fitting of SARS-CoV-2**

199 There were 29 COVID-19 cases data collected in Wuhan City from 26 November, 2019 to 23  
200 December, 2019, among which 10 cases had a history of the seafood market exposure and 19 cases  
201 had no history of the exposure ([Figure 2](#)).

202 The mix-age SEIARW model including all age groups fitted the reported data well ( $\chi^2 = 4.77 \times 10^{-6}$ ,  
203  $P > 0.999$ ). The results of the curve fitting were shown in [Figure 3](#). The results also showed that the  $b_p$   
204 = 1.1329 and  $b_W = 0.5255$ . The age-specific SEIARW model fitted with the reported data well by  
205 dividing the population into four age groups ( $\chi^2 = 4.99 \times 10^{-6}$ ,  $P > 0.999$ ), and five age groups ( $\chi^2 = 4.85$   
206  $\times 10^{-6}$ ,  $P > 0.999$ ). Thus, the prevalence of COVID-19 in each age group was simulated in [Figure 4](#).

### 207 **Transmissibility of SARS-CoV-2**

208 Based on the four-age-group SEIARW model, the highest transmissibility occurred from age group  
209 2 to 3 ( $SAR_{23} = 17.56$  per 10 million persons), followed by from age group 3 to 2 ( $SAR_{32} = 10.17$  per 10

210 million persons), from age group 4 to 4 ( $SAR_{44} = 6.99$  per 10 million persons), and from age group 3 to  
211 4 ( $SAR_{34} = 5.69$  per 10 million persons). The lowest transmissibility occurred from age group 1 to 2  
212 ( $SAR_{12} = 0.002$  per 10 million persons), followed by from age group 3 to 1 ( $SAR_{31} = 0.003$  per 10 million  
213 persons), from age group 4 to 2 ( $SAR_{42} = 0.52$  per 10 million persons), and from age group 1 to 3  
214 ( $SAR_{13} = 1.08$  per 10 million persons) (Figure 5-A).

215 Based on the five-age-group SEIARW model, the highest transmissibility occurred from age group  
216 4 to 5 ( $SAR_{45} = 12.40$  per 10 million persons), followed by from age group 5 to 4 ( $SAR_{54} = 6.61$  per 10  
217 million persons), from age group 4 to 4 ( $SAR_{44} = 5.08$  per 10 million persons), and from age group 2 to  
218 1 ( $SAR_{21} = 4.90$  per 10 million persons). The lowest transmissibility occurred from age group 3 to 4  
219 ( $SAR_{34} = 0.0002$  per 10 million persons), followed by from age group 1 to 1 ( $SAR_{11} = 0.22$  per 10 million  
220 persons), from age group 1 to 3 ( $SAR_{13} = 1.54$  per 10 million persons), and from age group 1 to 2  
221 ( $SAR_{12} = 1.59$  per 10 million persons) (Figure 5-B).

222 The results of the “knock-out” simulation showed that, based on the four-age-group SEIARW  
223 model, the scenarios  $b_{23} = 0$ ,  $b_{32} = 0$ , and  $b_{22} = 0$  led to the highest decrease for the number of cases.  
224 However, the scenarios  $b_{12} = 0$ ,  $b_{31} = 0$ , and  $b_{11} = 0$  led to the lowest decrease for the number of cases  
225 (Figure 6-A). Based on the five-age-group SEIARW model, the scenarios  $b_{44} = 0$ ,  $b_{45} = 0$ , and  $b_{54} = 0$   
226 led to the highest decrease for the number of cases. However, the scenarios  $b_{12} = 0$ ,  $b_{31} = 0$ , and  $b_{11} = 0$   
227 led to the lowest decrease for the number of cases (Figure 6-B).

## 228 Sensitivity analysis

229 The results of sensitivity analysis showed that the models were slightly sensitive to parameters  $p$ ,  
230  $\omega$ , and  $\gamma$  but not sensitive to parameters  $\kappa$ ,  $c$ ,  $\varepsilon$ ,  $f$ ,  $\omega'$ , and  $\gamma'$  (Figures 7 – 8).

231

## 232 Discussion

233 This is the first study to develop an age-specific SEIARW model to quantify the transmissibility of  
234 COVID-19 among different age groups. The results showed that our model fitted the reported data well,  
235 thus has the capability of estimating or predicting? the age-specific transmissibility of the virus.

236 Based on the four-age-group SEIARW model, the highest transmissibility occurred between the  
237 age groups 15 – 44 years and 45 – 64 years, among those  $\geq 65$  years, or from 45 – 64 years to  $\geq 65$   
238 years. The lowest transmissibility occurred from age group 0-14 years to 15 – 44 years, or from 45 – 64  
239 years to  $\leq 14$  years. Based on the five-age-group SEIARW model, the highest transmissibility occurred  
240 between age group 25 – 59 years and  $\geq 60$  years, or among 25 – 59 years. The lowest transmissibility  
241 occurred from age group 15 – 24 years to 25 – 59 years, or from age group 0-5 years to 6-14 years, or  
242 to 15-24 years. The “knock-out” simulation had the similar results. We concluded that the virus was  
243 more likely to transmit among older population.

244 These results revealed that SARS-CoV-2 has high transmissibility among adult older than 25 years  
245 old or elder people, but has low transmissibility among children or people younger than 14 years.  
246 These results were similar to the age-specific transmissibility of influenza A (H1N1)[4]. The age-specific  
247 control and prevention interventions are needed.

248 The reasons for the difference of age-specific transmissibility remain unclear. It might be related to  
249 the different contact characteristics among different age groups. Adults were more likely to work outside  
250 and came into contact with different individuals in work places, buses, subways, or even airplanes.  
251 However, children or younger people could stay at home during the outbreak, and they were less likely  
252 to get infected, or if they were infected, it was mostly from adults or elder people in the same family.

253 Our findings were based on the parameter estimation and the data from literatures. It is known that

254 the asymptomatic infection of COVID-19 exists. As reported by Bai *et al*[25], 1 of 6 cases was  
255 asymptomatic infected, with the proportion of asymptomatic of 0.17. As reported by Pan *et al*[26], 2 of 3  
256 cases was asymptomatic infected, with the proportion of asymptomatic of 0.67. There was a research  
257 showed that the asymptomatic infection would shed SARS-CoV-2 for 5 days[27]. However, there was  
258 not enough evidence to provide the clear epidemiological estimates of the parameters  $\rho$ ,  $\kappa$ ,  $\omega'$ , and  $\gamma'$   
259 which were related to asymptomatic characteristics. Although there was clinical evidence to calculate  
260 the parameters related to symptomatic cases such as incubation period, fatality rate, and duration from  
261 symptoms onset to diagnosis[1, 2], more epidemiological data are needed to explore the parameters.  
262 However, we performed a sensitivity analysis of all the nine parameters from the literatures, and we  
263 found that the models was slightly sensitive to parameters  $\rho$ ,  $\omega$ , and  $\gamma$  but not sensitive to parameters  $\kappa$ ,  
264  $c$ ,  $\varepsilon$ ,  $f$ ,  $\omega'$ , and  $\gamma'$ . Therefore, our results might be affected slightly by the parameter estimation.

265 Since we could not obtain the first-hand data, the results of our findings might have some  
266 uncertainties. However, our study aimed to develop and provide an age-specific transmission model for  
267 the public health department who has the big data to investigate the age-specific transmissibility in  
268 real world scenarios.

## 269 **Conclusions**

270 By calculating the published data, our model showed that SARS-CoV-2 has a high transmissibility  
271 among adults and elder people but low transmissibility among children and young people. Our results  
272 provide a mathematical model for investigating the age-specific transmissibility of SARS-CoV-2. More  
273 data and studies are needed to estimate the age-specific transmissibility in real world scenarios to  
274 better understand the characteristics of the widely spread virus.

275

276 **Abbreviations**

277 SARS-CoV-2: severe acute respiratory syndrome coronavirus 2; COVID-19: coronavirus disease 2019;  
278  $R_0$ : basic reproduction number; CI: confidence interval; BHRP: Bats-Hosts-Reservoir-People; RP:  
279 Reservoir-People; SEIARW: susceptible – exposed – symptomatic – asymptomatic – recovered –  
280 reservoir; SAR: secondary attack rate;  $R^2$ : coefficient of determination.

281 **Acknowledgements**

282 Not applicable.

283 **Funding**

284 This study was partly supported by Xiamen New Coronavirus Prevention and Control Emergency  
285 Tackling Special Topic Program (No: 3502Z2020YJ03) and the XMU Training Program of Innovation  
286 and Entrepreneurship for Undergraduates (No: 2019Y0805, 2019Y1497, 2019Y1499, 2019Y1500, and  
287 2019Y1501).

288 **Availability of data and materials**

289 Not applicable.

290 **Authors' contributions**

291 TMC and ZYZ designed research; TMC, YHS, BHZ, and ZYZ conceived the experiments, TMC, ZYZ,  
292 YZZ, JWX, ZL, JR, XCL, YW, MY, LL, SSY, JL, RYL, FX, YYS, and YCC conducted the experiments  
293 and analyzed the results; TMC, ZYZ, and QQH wrote the manuscript. All authors read and approved  
294 the final manuscript.

295 **Competing interests**

296 The authors declare that they have no competing interests.

297 **Consent for publication**

298 Not applicable.

299 **Ethics approval and consent to participate**

300 Not applicable.

301

302

303

304 **References**

305 1. Huang C, Wang Y, Li X, Ren L, Zhao J, Hu Y, *et al.* **Clinical features of patients infected with**  
306 **2019 novel coronavirus in Wuhan, China.** *Lancet.* 2020;395:497-506.

307 2. Li Q, Guan X, Wu P, Wang X, Zhou L, Tong Y, *et al.* **Early Transmission Dynamics in Wuhan,**  
308 **China, of Novel Coronavirus-Infected Pneumonia.** *N Engl J Med.* 2020; doi:  
309 10.1056/NEJMoa2001316.

310 3. Wu JT, Leung K, Leung GM. **Nowcasting and forecasting the potential domestic and**  
311 **international spread of the 2019-nCoV outbreak originating in Wuhan, China: a**  
312 **modelling study.** *Lancet.* 2020; doi: 10.1016/S0140-6736(20)30260-9.

313 4. Liu R, Leung RK, Chen T, Zhang X, Chen F, Chen S, *et al.* **The Effectiveness of Age-Specific**  
314 **Isolation Policies on Epidemics of Influenza A (H1N1) in a Large City in Central South**  
315 **China.** *PloS one.* 2015; **10**:e0132588.

316 5. Zhao S, Lin Q, Ran J, Musa SS, Yang G, Wang W, *et al.* **Preliminary estimation of the basic**  
317 **reproduction number of novel coronavirus (2019-nCoV) in China, from 2019 to 2020: A**  
318 **data-driven analysis in the early phase of the outbreak.** *Int J Infect Dis.* 2020;92:214-7.

319 6. Zhao S, Musa SS, Lin Q, Ran J, Yang G, Wang W, *et al.* **Estimating the Unreported Number**



- 320 **of Novel Coronavirus (2019-nCoV) Cases in China in the First Half of January 2020: A**  
321 **Data-Driven Modelling Analysis of the Early Outbreak.** *J Clin Med.* 2020; doi:  
322 10.3390/jcm9020388.
- 323 7. Chen T, Rui J, Wang Q, Zhao Z, Cui J-A, Yin L. **A mathematical model for simulating the**  
324 **phase-based transmissibility of a novel coronavirus.** *Infect Dis Poverty.* 2020; 9:24.
- 325 8. Chen T, Leung RK, Zhou Z, Liu R, Zhang X, Zhang L. **Investigation of key interventions for**  
326 **shigellosis outbreak control in China.** *PloS one.* 2014; 9:e95006.
- 327 9. Chen T, Gu H, Leung RK, Liu R, Chen Q, Wu Y, *et al.* **Evidence-Based interventions of**  
328 **Norovirus outbreaks in China.** *BMC Public Health.* 2016; 16:1072.
- 329 10. Xu XW, Wu XX, Jiang XG, Xu KJ, Ying LJ, Ma CL, *et al.* **Clinical findings in a group of**  
330 **patients infected with the 2019 novel coronavirus (SARS-Cov-2) outside of Wuhan,**  
331 **China: retrospective case series.** *BMJ.* 2020; 368:m606.
- 332 11. Linton NM, Kobayashi T, Yang Y, Hayashi K, Akhmetzhanov AR. **Incubation Period and Other**  
333 **Epidemiological Characteristics of 2019 Novel Coronavirus Infections with Right**  
334 **Truncation: A Statistical Analysis of Publicly Available Case Data.** *J Clin Med.* 2020; 9. pii:  
335 E538.
- 336 12. Longini IM, Jr., Nizam A, Xu S, Ungchusak K, Hanshaoworakul W, Cummings DA, *et al.*  
337 **Containing pandemic influenza at the source.** *Science.* 2005; 309:1083-7.
- 338 13. Japan MoH. **Development of patients with pneumonia associated with new coronavirus.**  
339 *Ministry of Health Japan.* cited 16 Jan 2020: Available:  
340 [https://www.mhlw.go.jp/stf/newpage\\_08906.html](https://www.mhlw.go.jp/stf/newpage_08906.html).
- 341 14. World Health Organization. **Novel Coronavirus – Thailand (ex-China).** *World Health*

- 342            *Organization.*            cited            January            20,            2020:            Available:
- 343            <https://www.who.int/csr/don/14-january-2020-novel-coronavirus-thailand/en/>.
- 344    15.    World Health Organization. **Novel Coronavirus – Japan (ex-China).** *World Health*
- 345            *Organization.*            cited            January            20,            2020:            Available:
- 346            <https://www.who.int/csr/don/17-january-2020-novel-coronavirus-japan-ex-china/en/>.
- 347    16.    China NHCotPsRo. **Update on the novel coronavirus pneumonia outbreak at 24 January**
- 348            **31st.**            Cited            on            February            23,            2020:Available:
- 349            [http://www.nhc.gov.cn/xcs/xxgzbd/gzbd\\_index.shtml](http://www.nhc.gov.cn/xcs/xxgzbd/gzbd_index.shtml).
- 350    17.    Zhao Z, Chen Q, Zhao B, Hannah MN, Wang N, Wang Y, *et al.* **The relative transmissibility**
- 351            **of shigellosis among male and female individuals in Hubei Province, China: a modelling**
- 352            **study.** *bioRxiv.* 2019; 677088.
- 353    18.    Chen T, Ka-Kit Leung R, Liu R, Chen F, Zhang X, Zhao J, *et al.* **Risk of imported Ebola virus**
- 354            **disease in China.** *Travel Med Infect Dis.* 2014;12:650-8.
- 355    19.    Chen T, Huang Y, Liu R, Xie Z, Chen S, Hu G. **Evaluating the effects of common control**
- 356            **measures for influenza A (H1N1) outbreak at school in China: A modeling study.** *PloS*
- 357            *one.* 2017; **12**:e0177672.
- 358    20.    Chen S, Yang D, Liu R, Zhao J, Yang K, Chen T. **Estimating the transmissibility of hand,**
- 359            **foot, and mouth disease by a dynamic model.** *Public Health.* 2019; **174**:42-8.
- 360    21.    Huang Z, Wang M, Qiu L, Wang N, Zhao Z, Rui J, *et al.* **Seasonality of the transmissibility of**
- 361            **hand, foot and mouth disease: a modelling study in Xiamen City, China.** *Epidemiol Infect.*
- 362            2019;147:e327.
- 363    22.    Liao Y, He Y, Lu Y, Yang H, Su Y, Chiang Y-C, *et al.* **Relative transmissibility of hand, foot**

- 364            **and mouth disease from male to female individuals.** *Epidemiol Infect.* 2019;147:e284.
- 365    23.    Yi B, Chen Y, Ma X, Rui J, Cui JA, Wang H, *et al.* **Incidence dynamics and investigation of**
- 366            **key interventions in a dengue outbreak in Ningbo City, China.** *PLoS Negl Trop Dis.*
- 367            2019;13:e0007659.
- 368    24.    Zhang S, Hu Q, Deng Z, Hu S, Liu F, Yu S, *et al.* **Transmissibility of acute haemorrhagic**
- 369            **conjunctivitis in small-scale outbreaks in Hunan Province, China.** *Sci Rep.* 2020; 10:119.
- 370    25.    Bai Y, Yao L, Wei T, Tian F, Jin DY, Chen L, *et al.* **Presumed Asymptomatic Carrier**
- 371            **Transmission of COVID-19.** *JAMA.* 2020; doi: 10.1001/jama.2020.2565..
- 372    26.    Pan X, Chen D, Xia Y, Wu X, Li T, Ou X, *et al.* **Asymptomatic cases in a family cluster with**
- 373            **SARS-CoV-2 infection.** *Lancet Infect Dis.* 2020; doi: 10.1016/S1473-3099(20)30114-6.
- 374    27.    Zou L, Ruan F, Huang M, Liang L, Huang H, Hong Z, *et al.* **SARS-CoV-2 Viral Load in Upper**
- 375            **Respiratory Specimens of Infected Patients.** *N Engl J Med.* 2020; doi:
- 376            10.1056/NEJMc2001737.
- 377
- 378
- 379
- 380

381 **Figures**

382

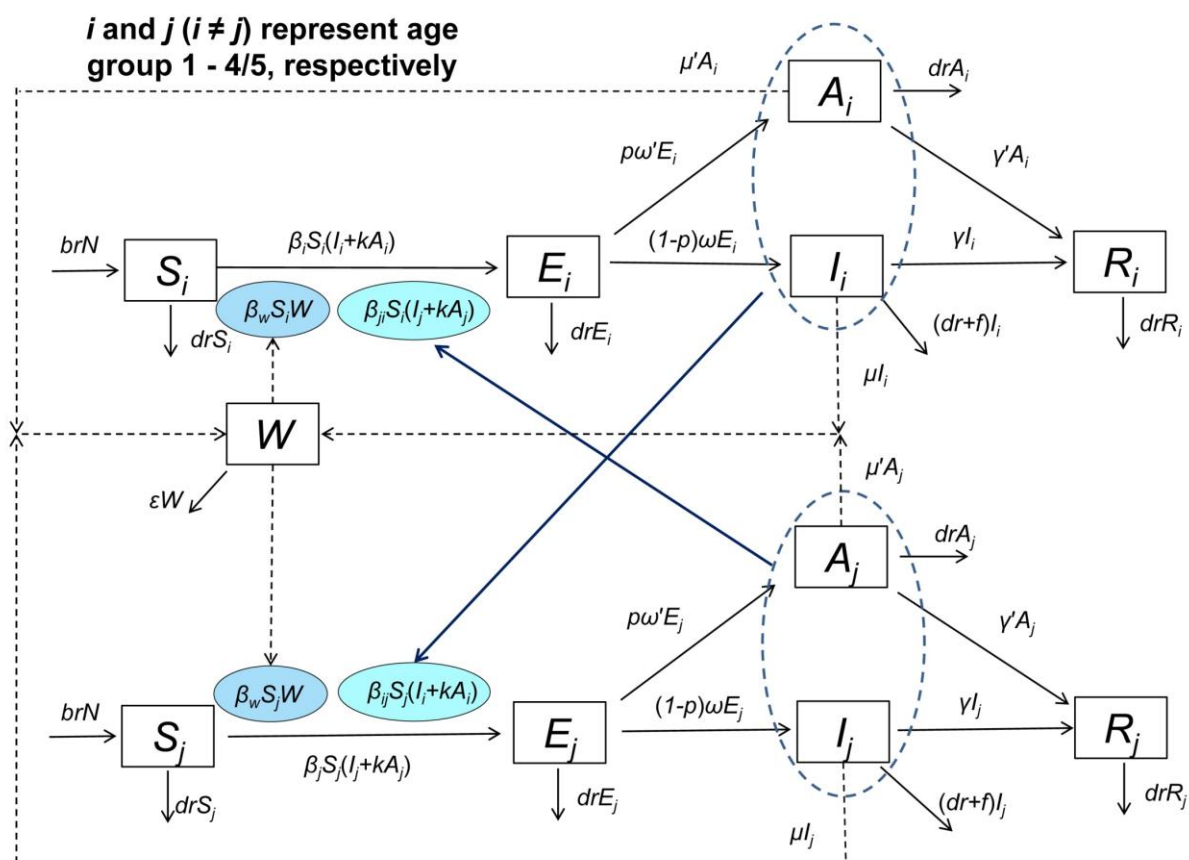

383

384 **Figure 1. Flowchart of the age-specific SEIARW model**

385

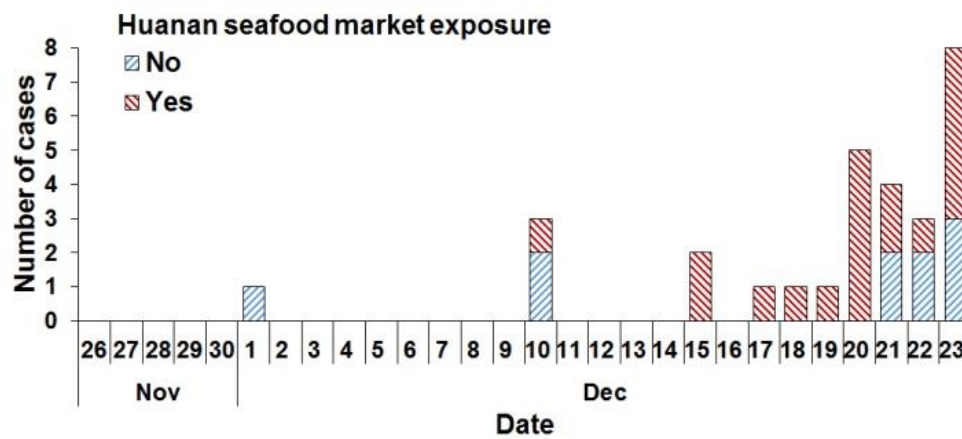

386

387 **Figure 2. Epidemic curve of collected data of reported COVID-19 cases in Wuhan City from 26**

388 **November, 2019 to 23 December, 2019**

389

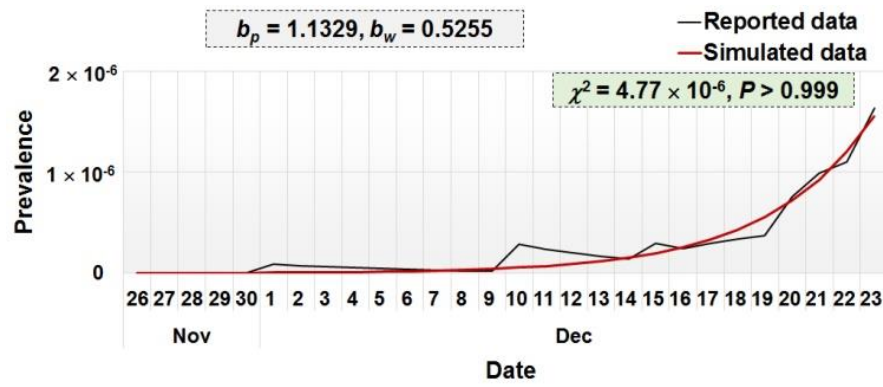

390

391 **Figure 3. Results of curve fitting of the mix age SEIARW model to the reported data**

392

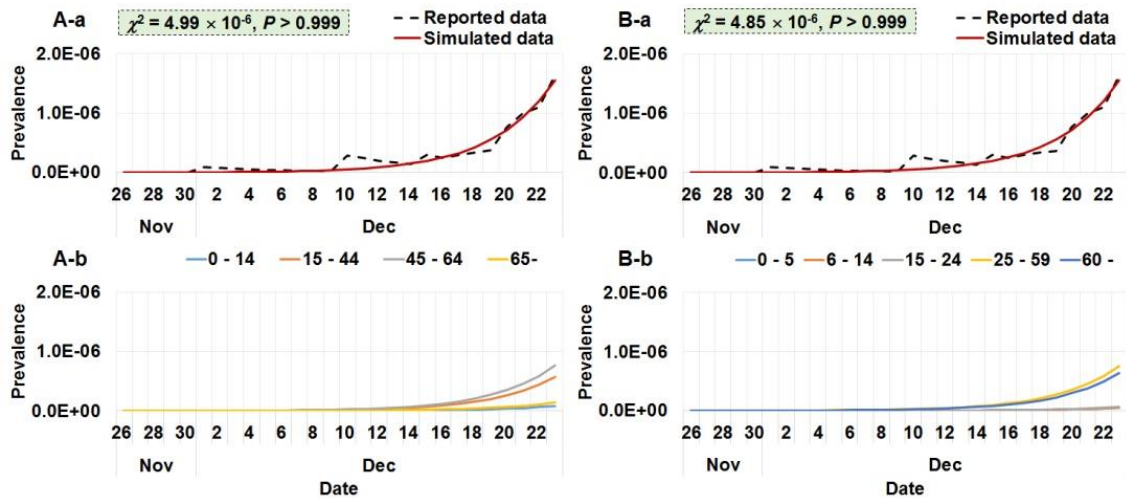

393

394 **Figure 4. Results of curve fitting of the age-specific SEIARW model to the reported data. A-a:**

395 curve fitting based on four age groups; A-b: the simulated prevalence by the age-specific SEIARW

396 model based on the four age groups; B-a: curve fitting based on five age groups; B-b: the simulated

397 prevalence by the age-specific SEIARW model based on the five age groups.

398

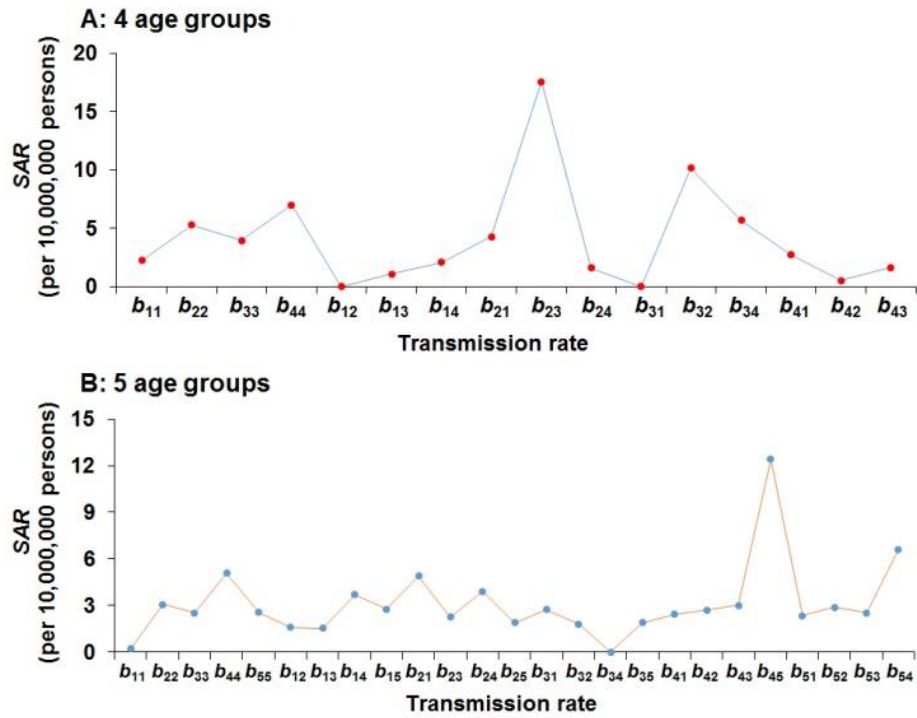

399

400 **Figure 5. SAR simulated from the age-specific SEIARW model. A: SAR based on four age groups;**

401 B: SAR based on five age groups.

402



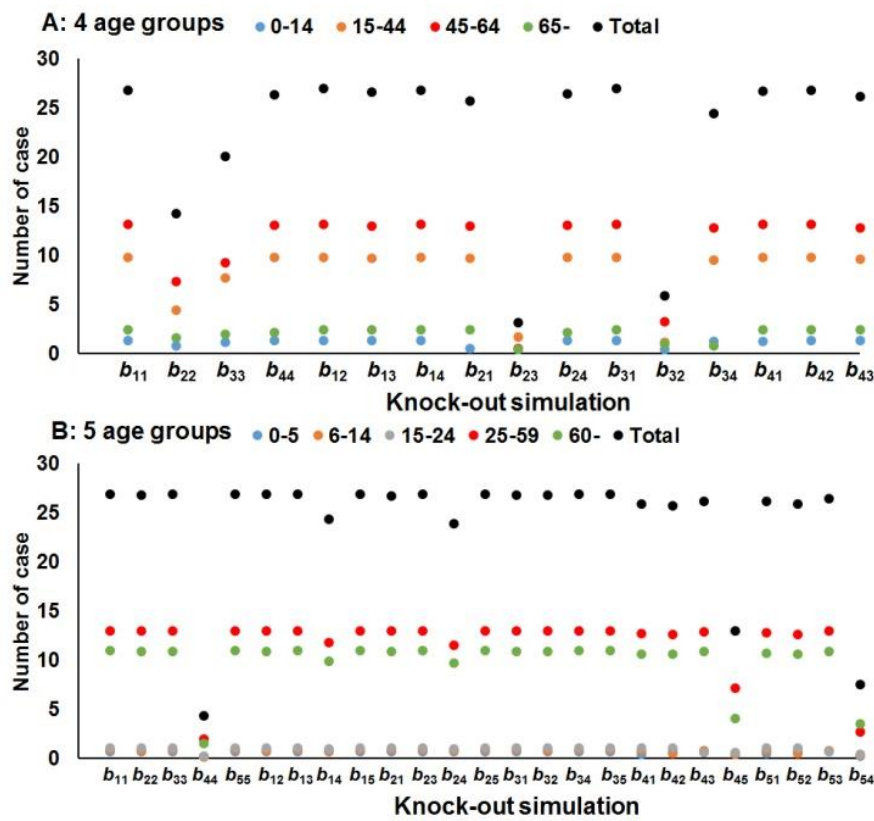

403

404 **Figure 6. Results of the “knock-out” simulation from the age-specific SEIARW model. A: results**

405 based on four age groups; B: results based on five age groups.

406

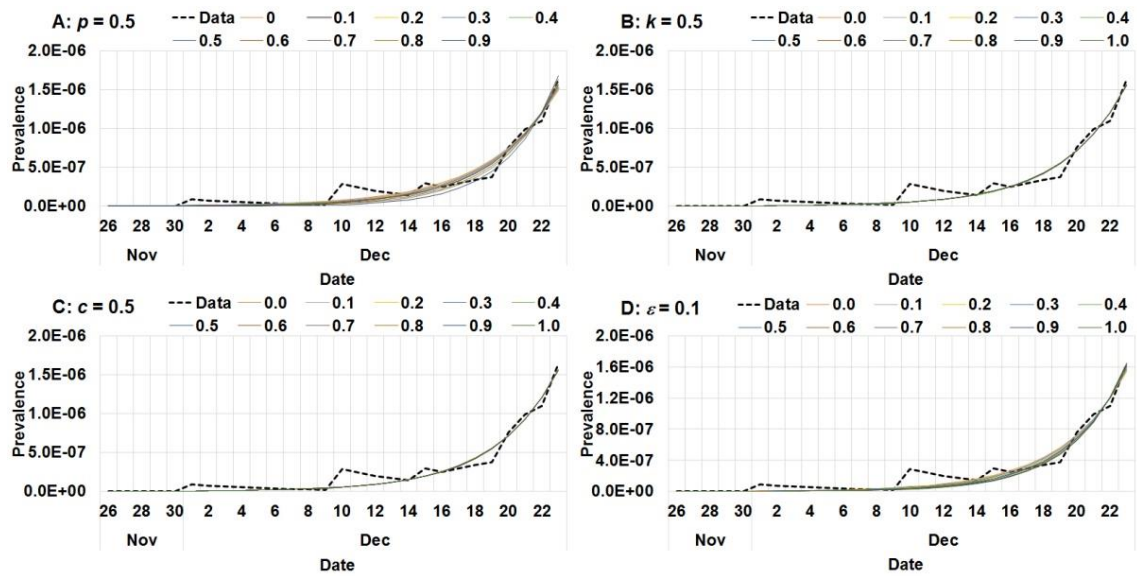

407

408 **Figure 7. Results of sensitivity analysis of  $p$ ,  $\kappa$ ,  $c$ , and  $\epsilon$ .** A: sensitivity analysis of  $p$ ; B: sensitivity

409 analysis of  $\kappa$ ; C: sensitivity analysis of  $c$ ; D: sensitivity analysis of  $\epsilon$ .

410

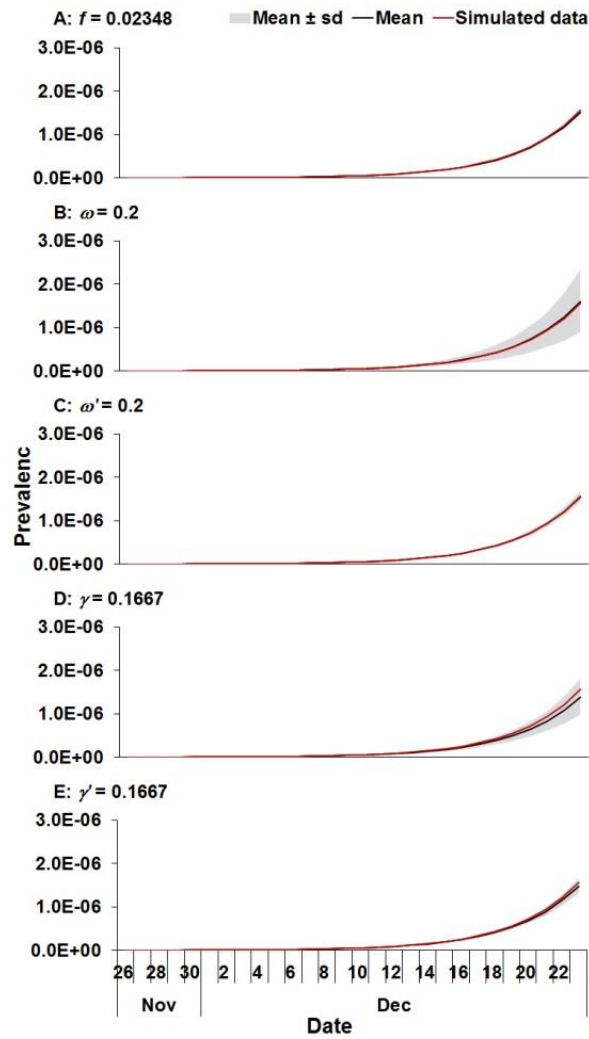

411

412 **Figure 8. Results of sensitivity analysis of  $\omega$ ,  $\omega'$ ,  $\gamma$ ,  $\gamma'$  and  $f$ .** A: sensitivity analysis of  $\omega$ ; B:

413 sensitivity analysis of  $\omega'$ ; C: sensitivity analysis of  $\gamma$ ; D: sensitivity analysis of  $\gamma'$ ; F: sensitivity analysis of

414  $f$ .

415

416

417 **Tables**

418 **Table 1. Variables in the age-specific SEIARW model**

| <b>Variables</b> | <b>Description</b>                               | <b>Unit</b>                  |
|------------------|--------------------------------------------------|------------------------------|
| $S_i$            | Susceptible individuals density of age group $i$ | Individuals·km <sup>-2</sup> |
| $S_j$            | Susceptible individuals density of age group $j$ | Individuals·km <sup>-2</sup> |
| $E_i$            | Exposed individuals density of age group $i$     | Individuals·km <sup>-2</sup> |
| $E_j$            | Exposed individuals density of age group $j$     | Individuals·km <sup>-2</sup> |
| $I_i$            | Infectious individuals density age group $i$     | Individuals·km <sup>-2</sup> |
| $I_j$            | Infectious individuals density age group $j$     | Individuals·km <sup>-2</sup> |
| $A_i$            | Asymptomatic individuals density age group $i$   | Individuals·km <sup>-2</sup> |
| $A_j$            | Asymptomatic individuals density age group $j$   | Individuals·km <sup>-2</sup> |
| $R_i$            | Recovered individuals density age group $i$      | Individuals·km <sup>-2</sup> |
| $R_j$            | Recovered individuals density age group $j$      | Individuals·km <sup>-2</sup> |
| $W$              | Pathogen concentration in the seafood market     | Viruses·mL <sup>-3</sup>     |
| $N$              | Total number of population density               | Individuals·km <sup>-2</sup> |

419

420

421 **Table 2. Description and values of parameters in the age-specific SEIARW model**

| Parameter      | Description                                                               | Unit                                                      | Value  | Range    | Method         |
|----------------|---------------------------------------------------------------------------|-----------------------------------------------------------|--------|----------|----------------|
| $\beta_{ii}^*$ | Transmission relative rate among age group $i$                            | Individuals <sup>-1</sup> ·days <sup>-1</sup>             | -      | -        | -              |
| $b_{ii}^*$     | Scaled $i$ -to- $i$ contact rate                                          | days <sup>-1</sup>                                        | -      | $\geq 0$ | Curve fitting  |
| $\beta_{ij}^*$ | Transmission relative rate from age group $i$ to $j$                      | Individuals <sup>-1</sup> ·days <sup>-1</sup>             | -      | -        | -              |
| $b_{ij}^*$     | Scaled $i$ -to- $j$ contact rate                                          | days <sup>-1</sup>                                        | -      | $\geq 0$ | Curve fitting  |
| $\beta_{ji}^*$ | Transmission relative rate from age group $j$ to $i$                      | Individuals <sup>-1</sup> ·days <sup>-1</sup>             | -      | -        | -              |
| $b_{ji}^*$     | Scaled $j$ -to- $i$ contact rate                                          | days <sup>-1</sup>                                        | -      | $\geq 0$ | Curve fitting  |
| $\beta_{jj}^*$ | Transmission relative rate among age group $j$                            | Individuals <sup>-1</sup> ·days <sup>-1</sup>             | -      | -        | -              |
| $b_{jj}^*$     | Scaled $j$ -to- $j$ contact rate                                          | days <sup>-1</sup>                                        | -      | $\geq 0$ | Curve fitting  |
| $\beta_w$      | Seafood market contact rate                                               | mL <sup>-3</sup> ·cells <sup>-1</sup> ·days <sup>-1</sup> | -      | -        | -              |
| $b_w$          | Scaled market-to-person contact rate                                      | days <sup>-1</sup>                                        | 0.9122 | $\geq 0$ | Curve fitting  |
| $\kappa$       | Relative transmissibility rate of asymptomatic to symptomatic individuals | 1                                                         | 0.5    | 0-1      | Reference [12] |

---

|               |                                                             |                                                                                       |         |                 |                               |
|---------------|-------------------------------------------------------------|---------------------------------------------------------------------------------------|---------|-----------------|-------------------------------|
| $\rho$        | Proportion of the asymptomatic                              | 1                                                                                     | 0.5     | 0-1             | Reference [12]                |
| $\omega$      | Incubation relative rate                                    | days <sup>-1</sup>                                                                    | 0.2     | 0.1428-0.25     | References [2, 10, 11]        |
| $\omega'$     | Latent relative rate                                        | days <sup>-1</sup>                                                                    | 0.2     | 0.1428-0.25     | References [2, 10, 11]        |
| $\gamma$      | Removed rate of the infectious                              | days <sup>-1</sup>                                                                    | 0.1667  | 0.125-0.25      | References [2, 10, 11, 13-15] |
| $\gamma'$     | Removed rate of the asymptomatic                            | days <sup>-1</sup>                                                                    | 0.1667  | 0.125-0.25      | References [2, 10, 11, 13-15] |
| $f$           | Fatality of the disease                                     | 1                                                                                     | 0.02348 | 0.02198-0.03186 | References [12]               |
| $\varepsilon$ | Pathogen lifetime relative rate                             | days <sup>-1</sup>                                                                    | 0.1     | -               | Assumption                    |
| $\mu$         | Person-to-reservoir contact rate (“shedding” by Infectious) | cells·mL <sup>-3</sup> ·day <sup>-1</sup> ·km <sup>2</sup> ·individuals <sup>-1</sup> | -       | -               | -                             |
| $\mu'$        | Person-to-reservoir contact rate (“shedding” by             | cells·mL <sup>-3</sup> ·day <sup>-1</sup> ·km <sup>2</sup> ·individuals <sup>-1</sup> | -       | -               | -                             |

---

---

|           |                                                               |   |            |     |                                |
|-----------|---------------------------------------------------------------|---|------------|-----|--------------------------------|
|           | Asymptomatic)                                                 |   |            |     |                                |
| <i>c</i>  | Relative shedding rate of asymptomatic compared to infectious | 1 | 0.5        | 0-1 | Reference <a href="#">[12]</a> |
| <i>br</i> | Birth rate of the population                                  | 1 | 0.00004266 | -   | Wuhan Statistical Yearbook     |
| <i>dr</i> | Death rate of the population                                  | 1 | 0.00003184 | -   | Wuhan Statistical Yearbook     |

---

422 \*: *i* and *j* represent age group 1 to 4/5, respectively, and  $i \neq j$

423

424
